# Supplementary material for: Formation of nematic order in 3D systems of hard colloidal ellipsoids
Source: Royal Society of Chemistry journal article supplement (doi:10.1039/c9sm01926j), 2019-12-12
Supplement: c9sm01926j1.pdf [file c9sm01926j1.pdf]

## Formation of nematic order in 3D systems of hard colloidal ellipsoids

### Supplementary Information

Jörg Roller,<sup>a</sup> John Geiger,<sup>a</sup> Markus Voggenreiter,<sup>a</sup> Janne-Mieke Meijer,<sup>b,c</sup> and Andreas Zumbusch<sup>a</sup>

<sup>a</sup> Department of Chemistry, University of Konstanz, Konstanz, Germany

<sup>b</sup> Department of Physics, University of Konstanz, Konstanz, Germany

<sup>c</sup> University of Amsterdam, Amsterdam, The Netherlands

#### **Bond order analysis**

As described in the main text, we performed a bond order analysis for our data. For this we calculated the order parameter  $q_4$  and  $q_6$  that identify 4-fold and 6-fold symmetries in the 3D positions, following the literature [1].

In figure S1 the data for  $q_4$  and  $q_6$  are shown for the highest achieved volume fraction  $\phi$  for samples with different aspect ratio  $a/b$ . The low values for  $q_4$  and  $q_6$  indicate the absence of crystalline order, since e.g. FCC (face center cubic) and HCP (hexagonal close packing) structures would have high  $q_6$  values ( $q_6 > 0.5$ ) and a SC (simple cubic) structure would result in high  $q_4$  values ( $q_4 > 0.7$ ).

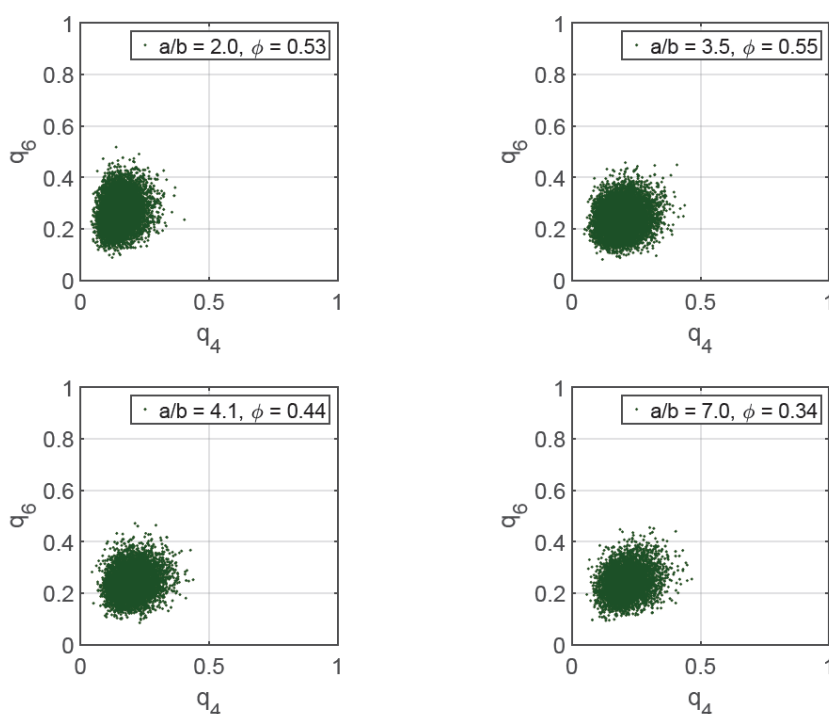

**Fig. S1** Result for  $q_4$  and  $q_6$  of the bond order analysis for the densest samples of different aspect ratio  $a/b$  show the absence of crystalline order in each sample.

#### **References**

[1] P.J. Steinhardt, D.R. Nelson and M. Ronchetti, *Physical Review B*, 1983, **28**, 784-805
